# Supplementary material
Source: PubMed Central journal article supplement (PMC6400427)
Supplement: ja8b11466_si_002.pdf [file ja8b11466_si_002.pdf]

**Cobalt-Catalyzed Electrophilic Aminations with Anthranils: An Expedient Route to Condensation Quinolines\*\***

*Jie Li,\* Eric Tan, Niklas Keller, Yi-Hung Chen, Peter M. Zehetmaier, Andreas C. Jakowetz, Thomas Bein\* and Paul Knochel\**

## **Contents**

|                                                        |      |
|--------------------------------------------------------|------|
| Methods                                                | S-2  |
| UV-Vis Spectroscopy and Photoluminescence Spectroscopy | S-3  |
| Tauc Plots                                             | S-17 |
| Photoluminescence Quantum Yield (PLQY)                 | S-20 |
| Time-Correlated Single Photon Counting                 | S-21 |
| Cyclic Voltammetry and Energy Levels of HOMO and LUMO  | S-26 |

## Methods

**UV-VIS-NIR** spectra were recorded using a Perkin-Elmer Lambda 1050 spectrometer equipped with a 150 mm integrating sphere and photomultiplier tube (PMT) and InGaAs detectors.

**Steady-state photoluminescence** (PL) measurements and **time-correlated single photon counting** (TCSPC) measurements were performed using a PicoQuant FluoTime 300 spectrometer equipped with a 378 nm picosecond diode laser (pulse power  $0.99 \text{ nJ cm}^{-2}$ , pulse rate 40 MHz).

**Cyclic voltammetry** measurements were measured using 100 or 200  $\mu\text{M}$  solutions of the condensed N-heterocycles in acetonitrile, with 0.2 M tetrabutylammonium hexafluorophosphate as electrolyte and 0.2 mM ferrocene as internal reference and external reference. Measurements were performed with a Metrohm Autolab PGSTAT302N potentiostat, using Pt wires as the working electrode and counter electrode and an Ag wire as reference electrode. The potential window was from  $-1.6 \text{ V}$  up to  $2.6 \text{ V}$  with a scan speed of  $50 \text{ mVs}^{-1}$ .

## UV-Vis spectroscopy and photoluminescence spectroscopy

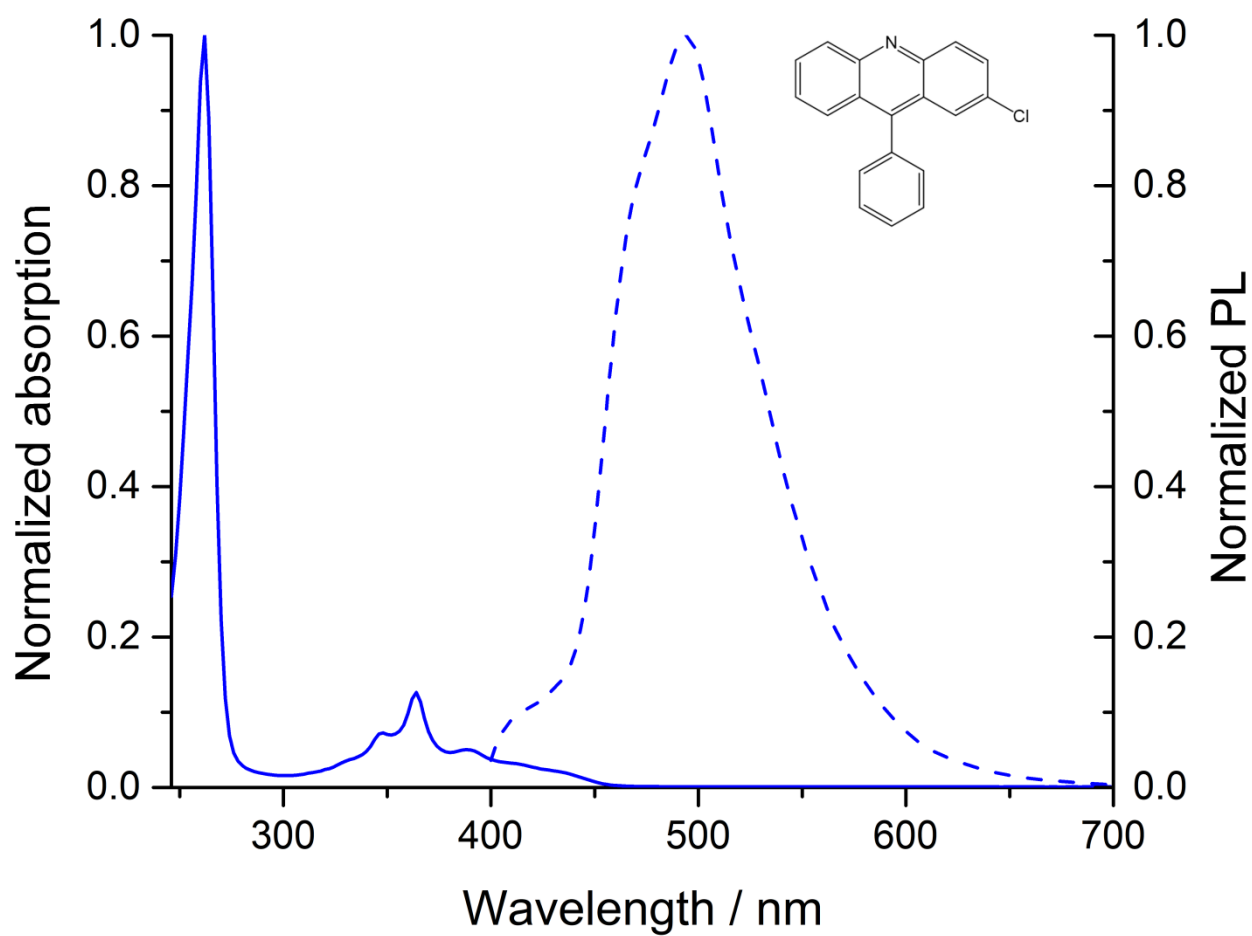

**Figure 1:** Normalized absorption and photoluminescence spectrum of compound **6a** in solution (50  $\mu$ M in  $\text{CHCl}_3$ ).

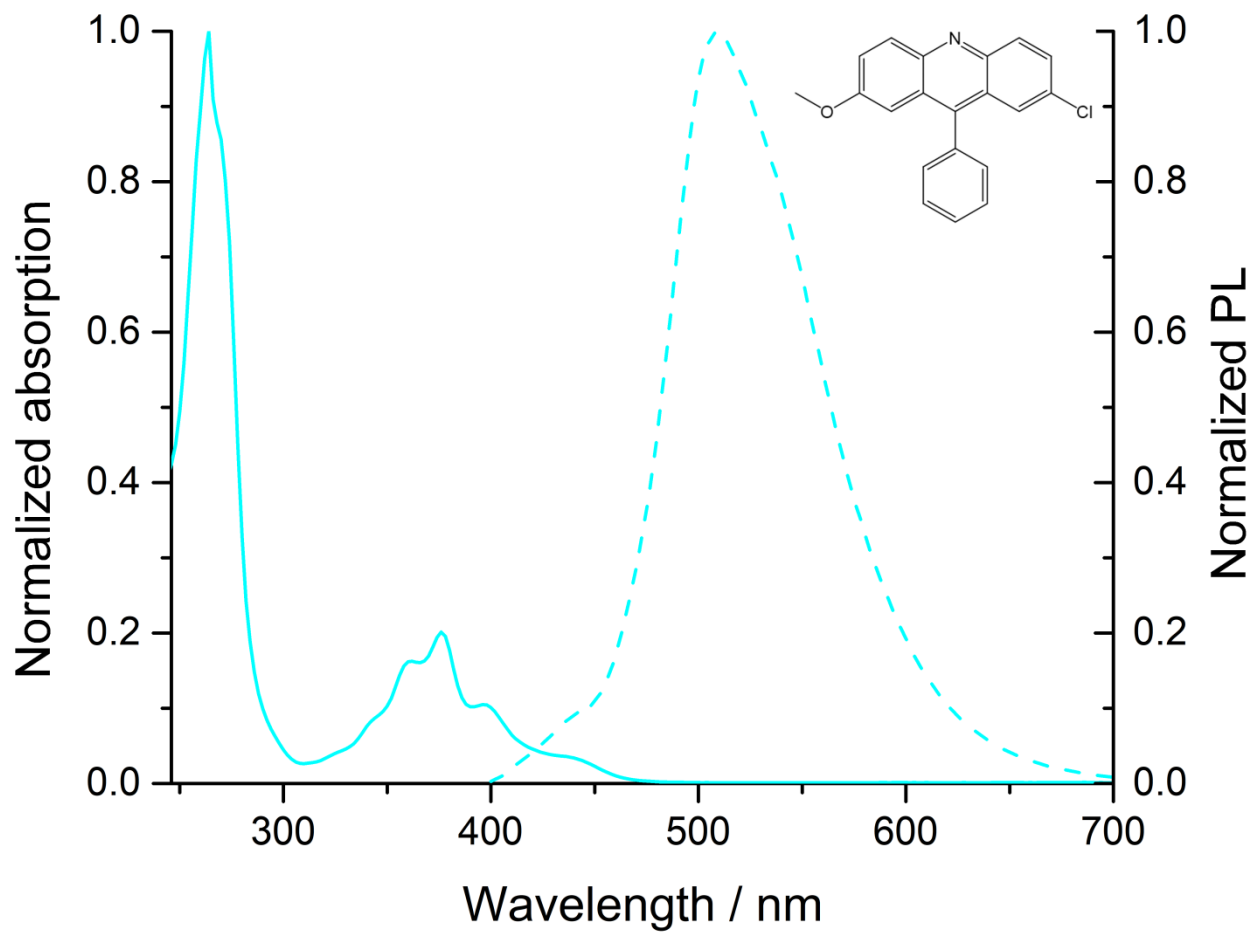

**Figure 2:** Normalized absorption and photoluminescence spectrum of compound **6b** in solution (50  $\mu$ M in  $\text{CHCl}_3$ ).

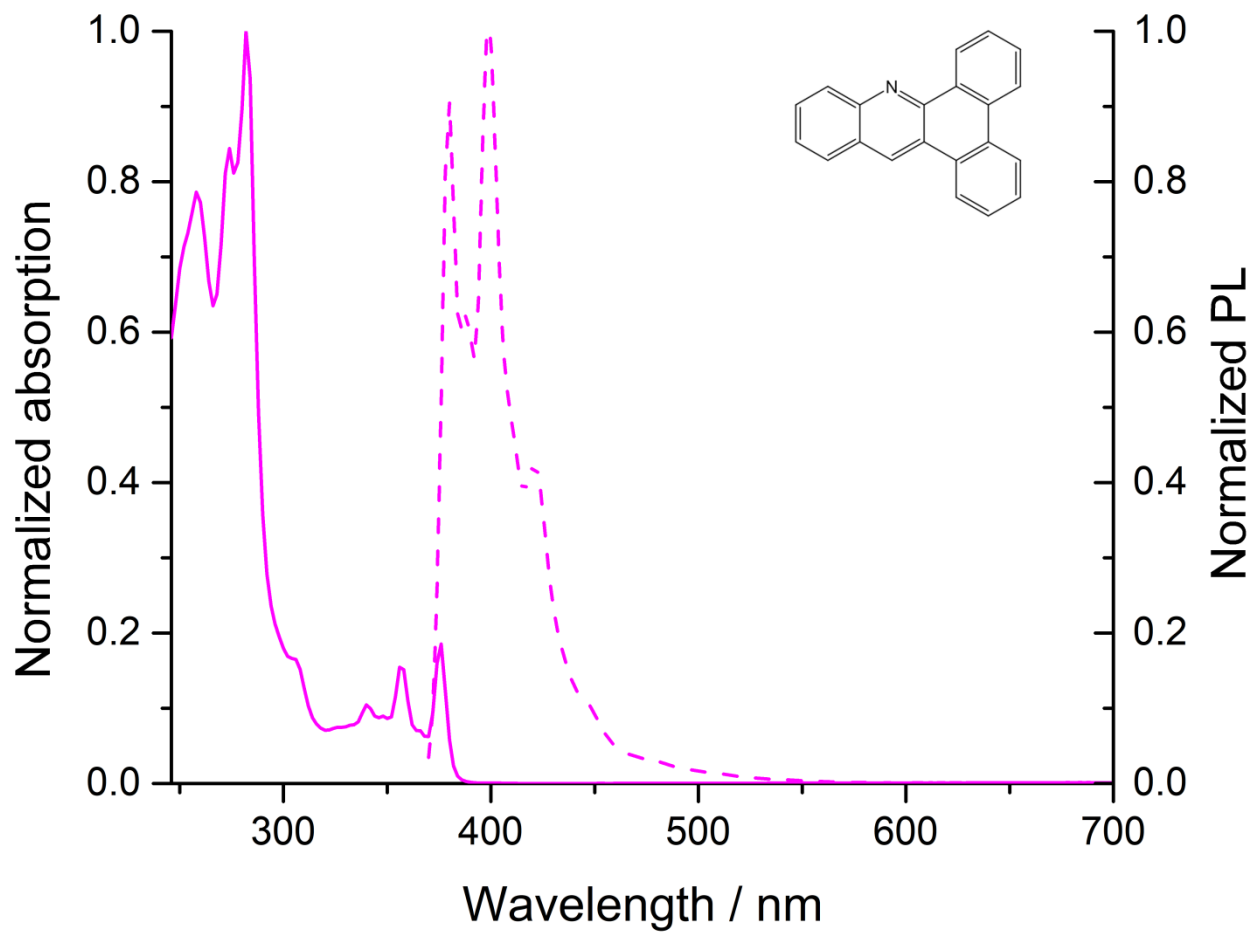

**Figure 3:** Normalized absorption and photoluminescence spectrum of compound **10a** in solution (50 μM in CHCl<sub>3</sub>).

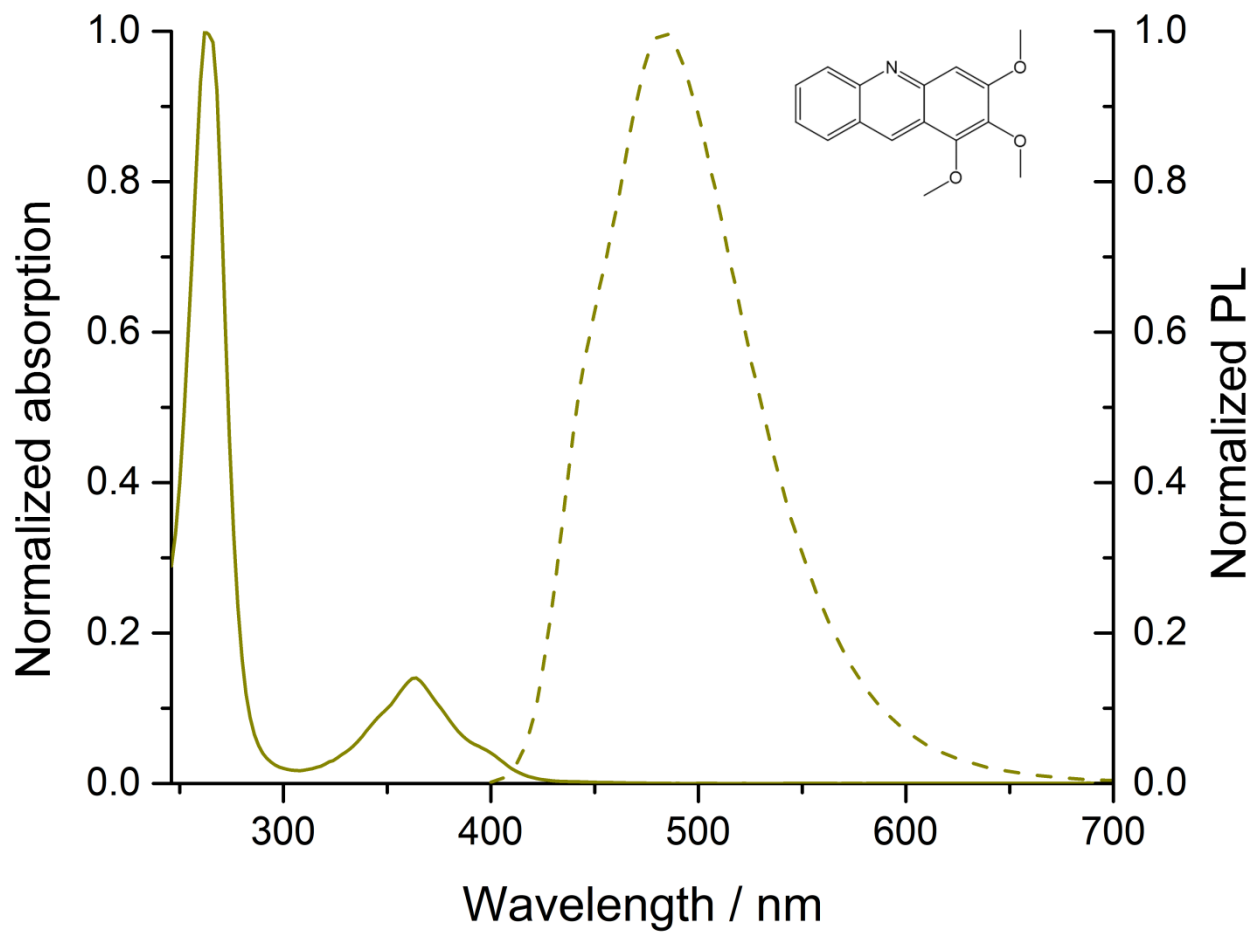

**Figure 4:** Normalized absorption and photoluminescence spectrum of compound **10b** in solution (50  $\mu$ M in  $\text{CHCl}_3$ ).

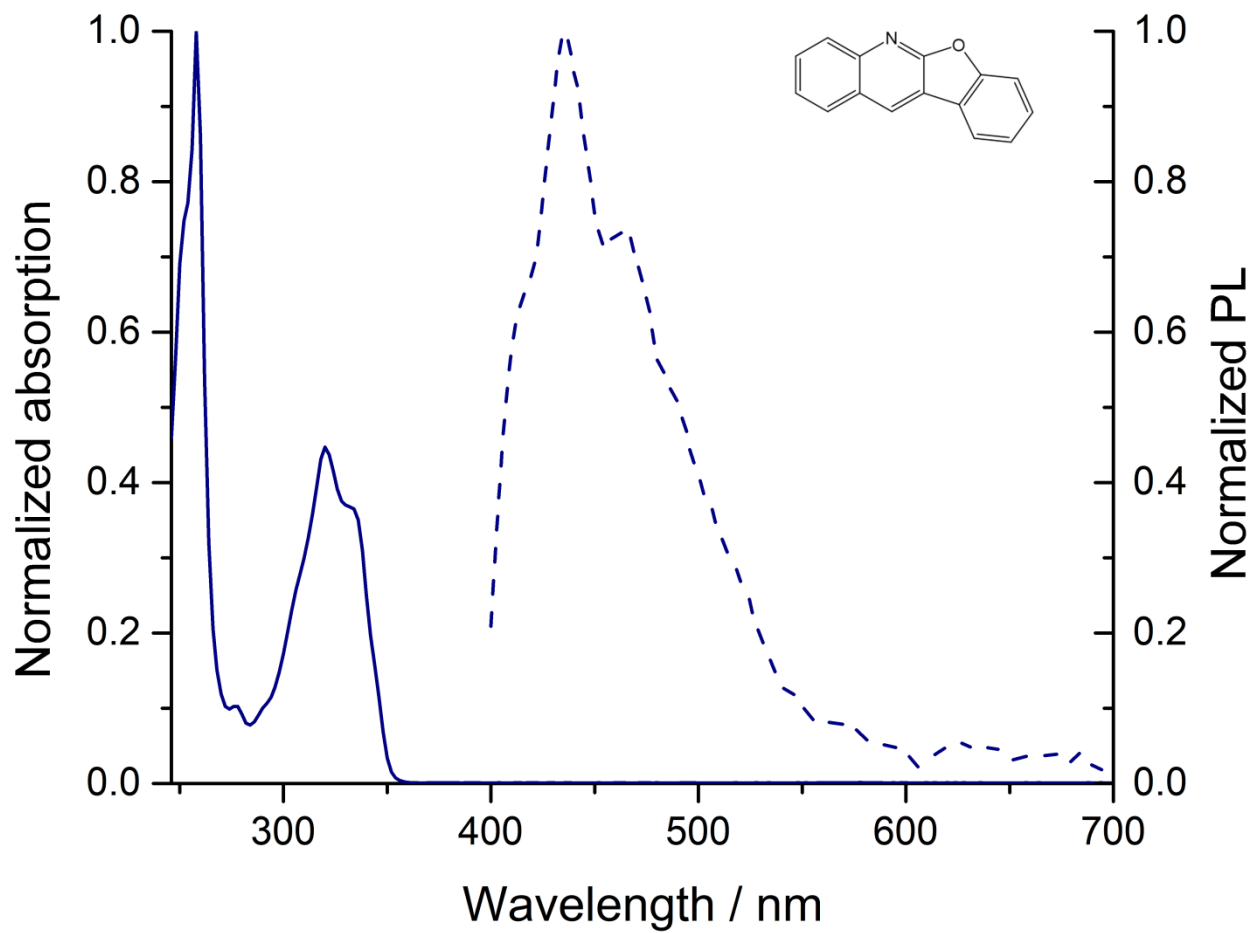

**Figure 5:** Normalized absorption and photoluminescence spectrum of compound **10d** in solution (50 μM in CHCl<sub>3</sub>).



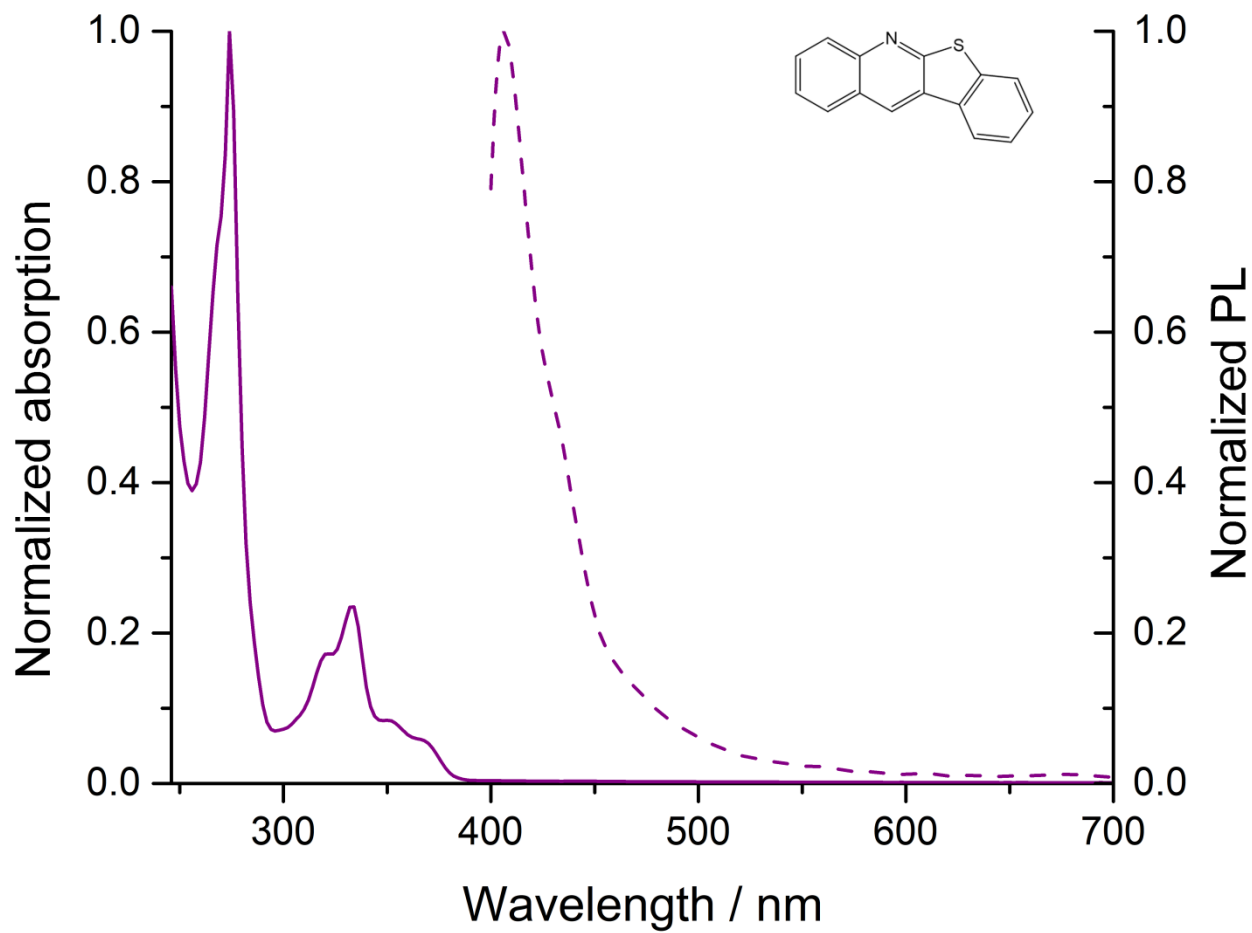

**Figure 6:** Normalized absorption and photoluminescence spectrum of compound **10e** in solution (50  $\mu$ M in  $\text{CHCl}_3$ ).

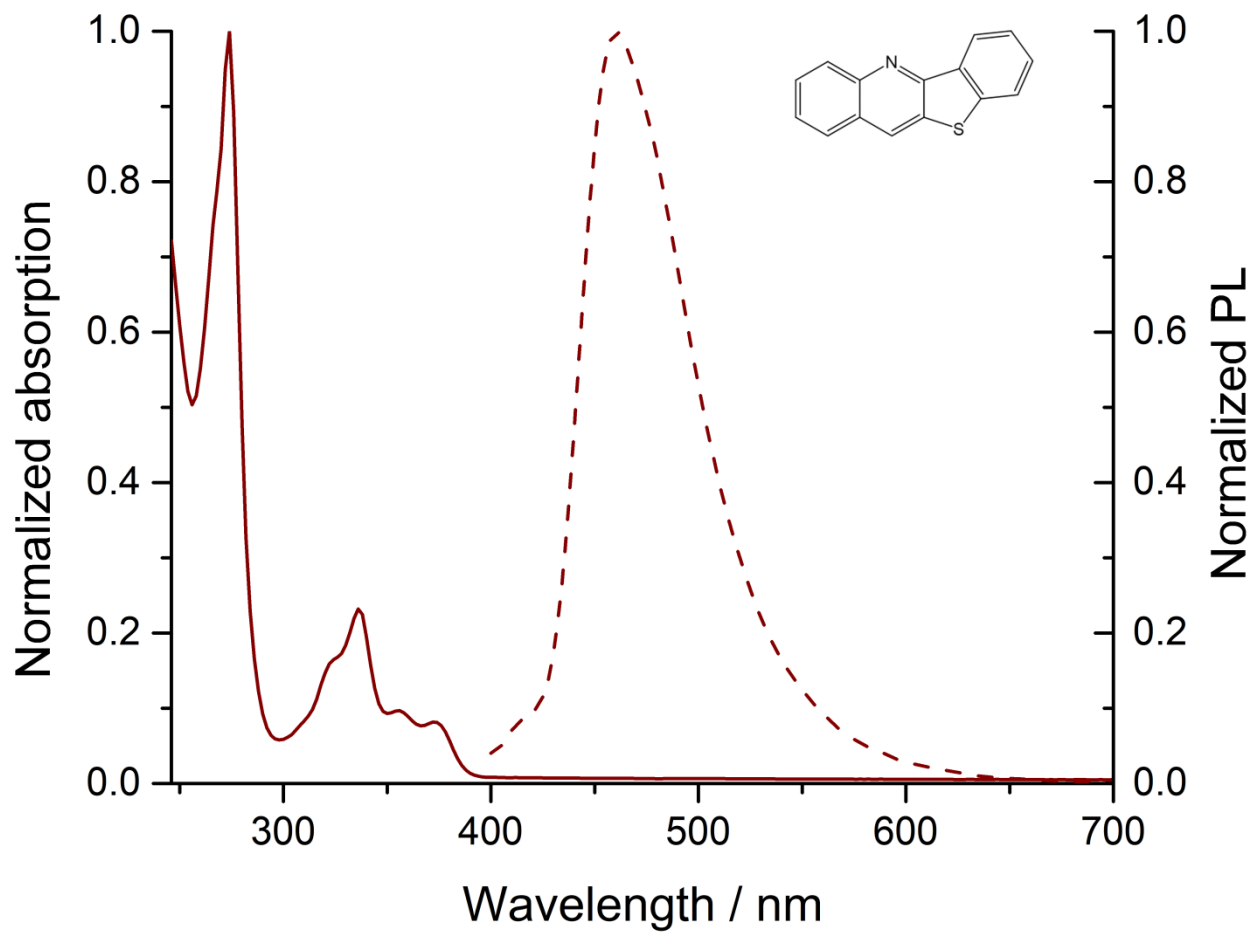

**Figure 7:** Normalized absorption and photoluminescence spectrum of compound **10f** in solution (50  $\mu$ M in  $\text{CHCl}_3$ ).

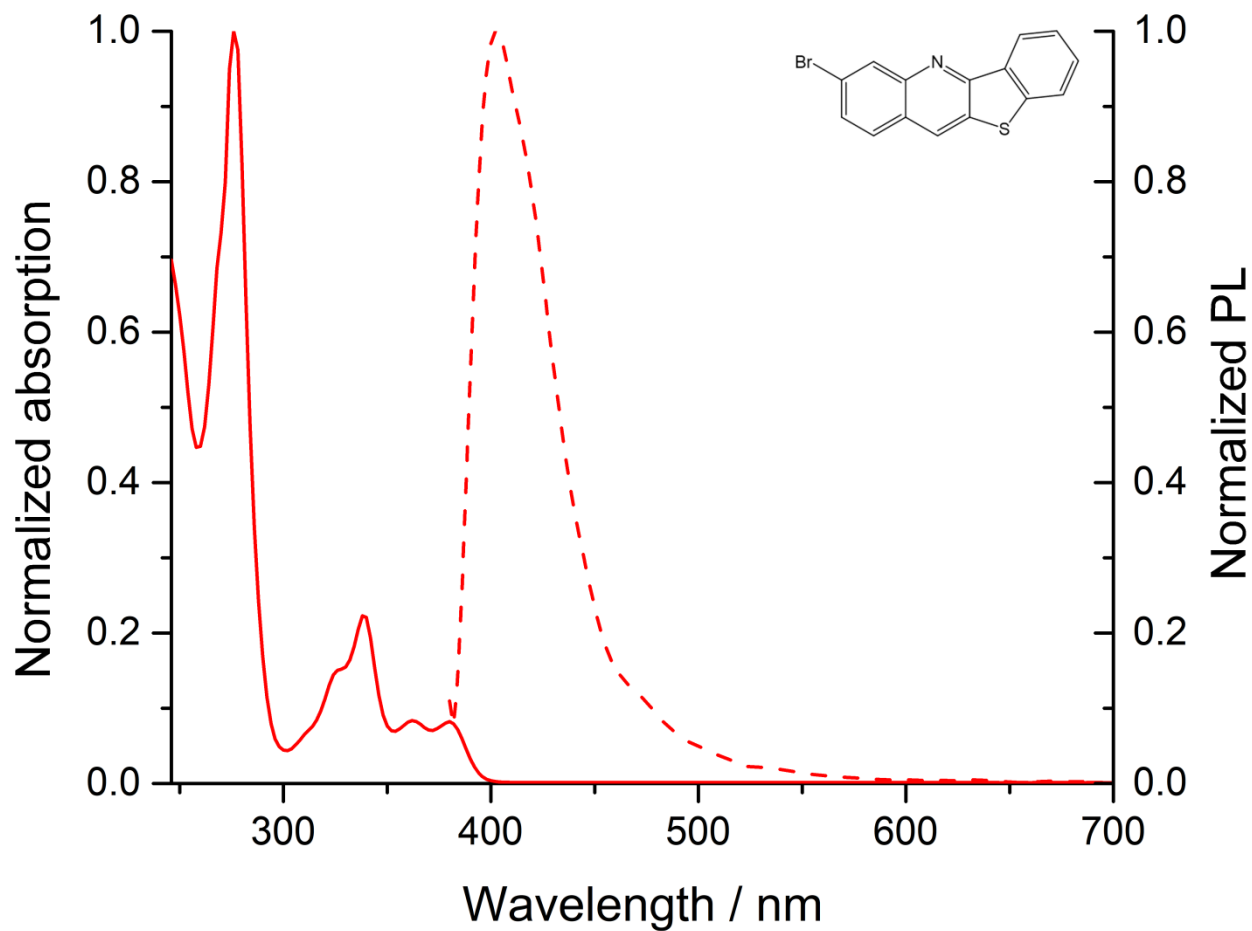

**Figure 8:** Normalized absorption and photoluminescence spectrum of compound **10g** in solution (50  $\mu\text{M}$  in  $\text{CHCl}_3$ ).

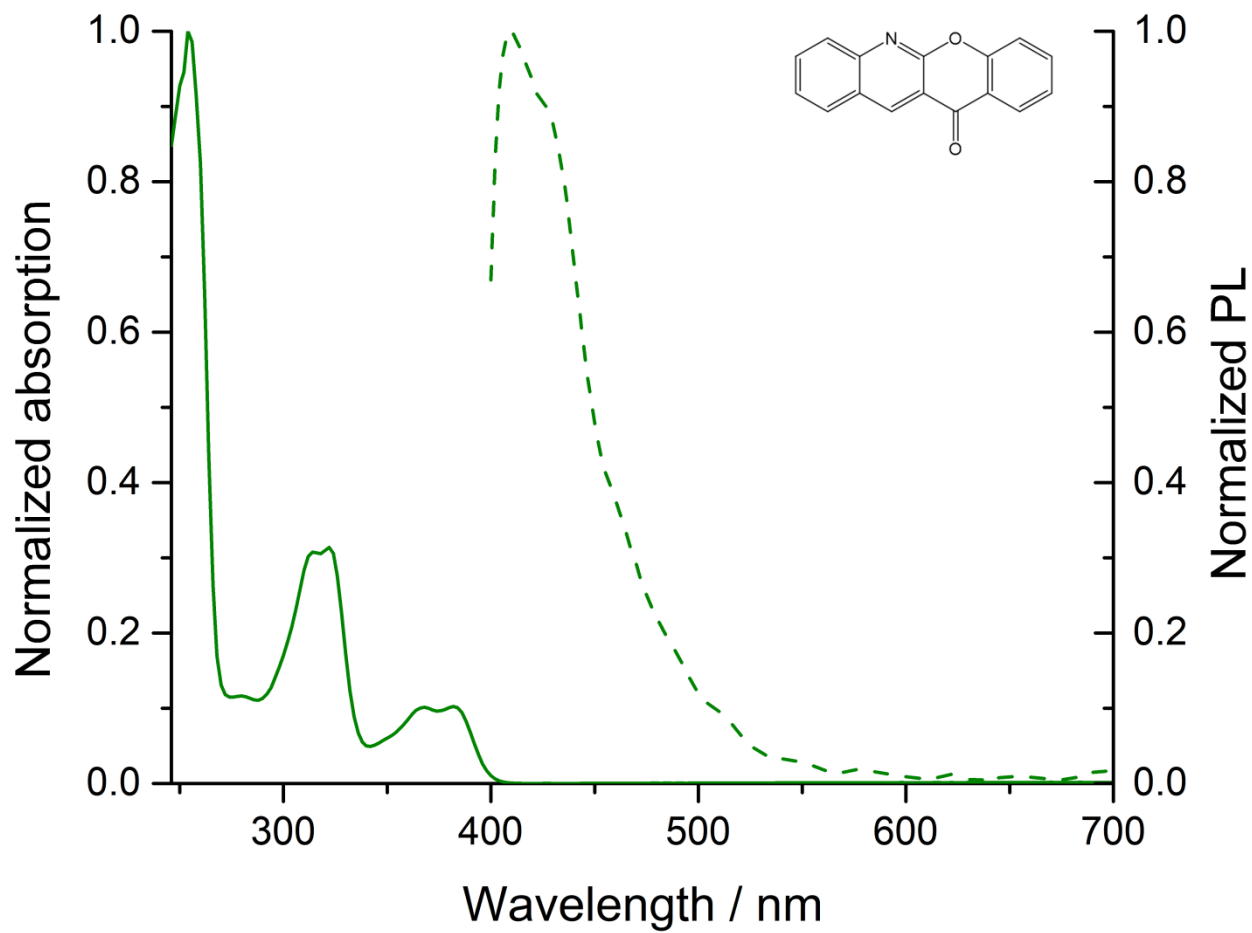

**Figure 9:** Normalized absorption and photoluminescence spectrum of compound **10j** in solution (50 μM in CHCl<sub>3</sub>).

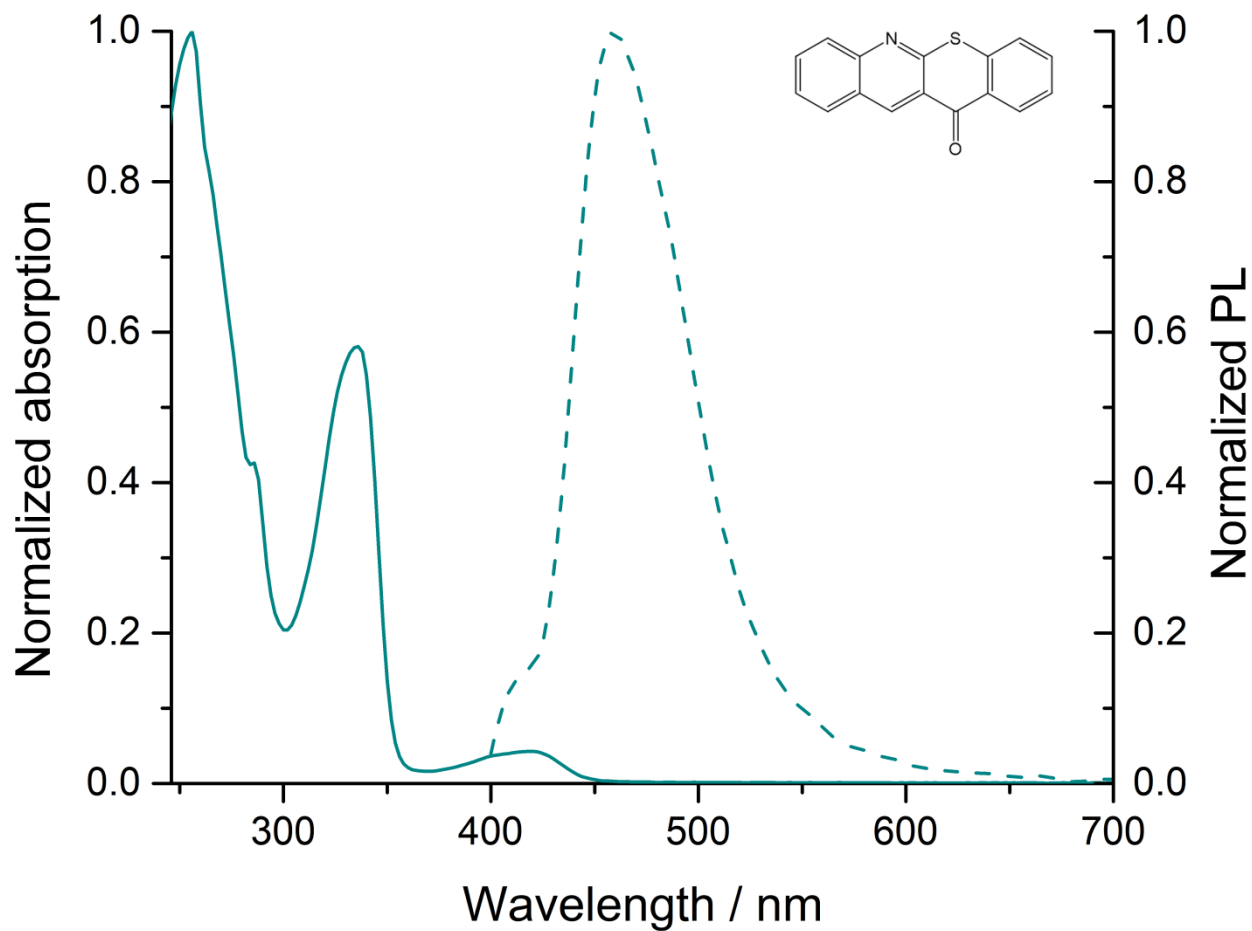

**Figure 10:** Normalized absorption and photoluminescence spectrum of compound **10k** in solution (50 μM in CHCl<sub>3</sub>).

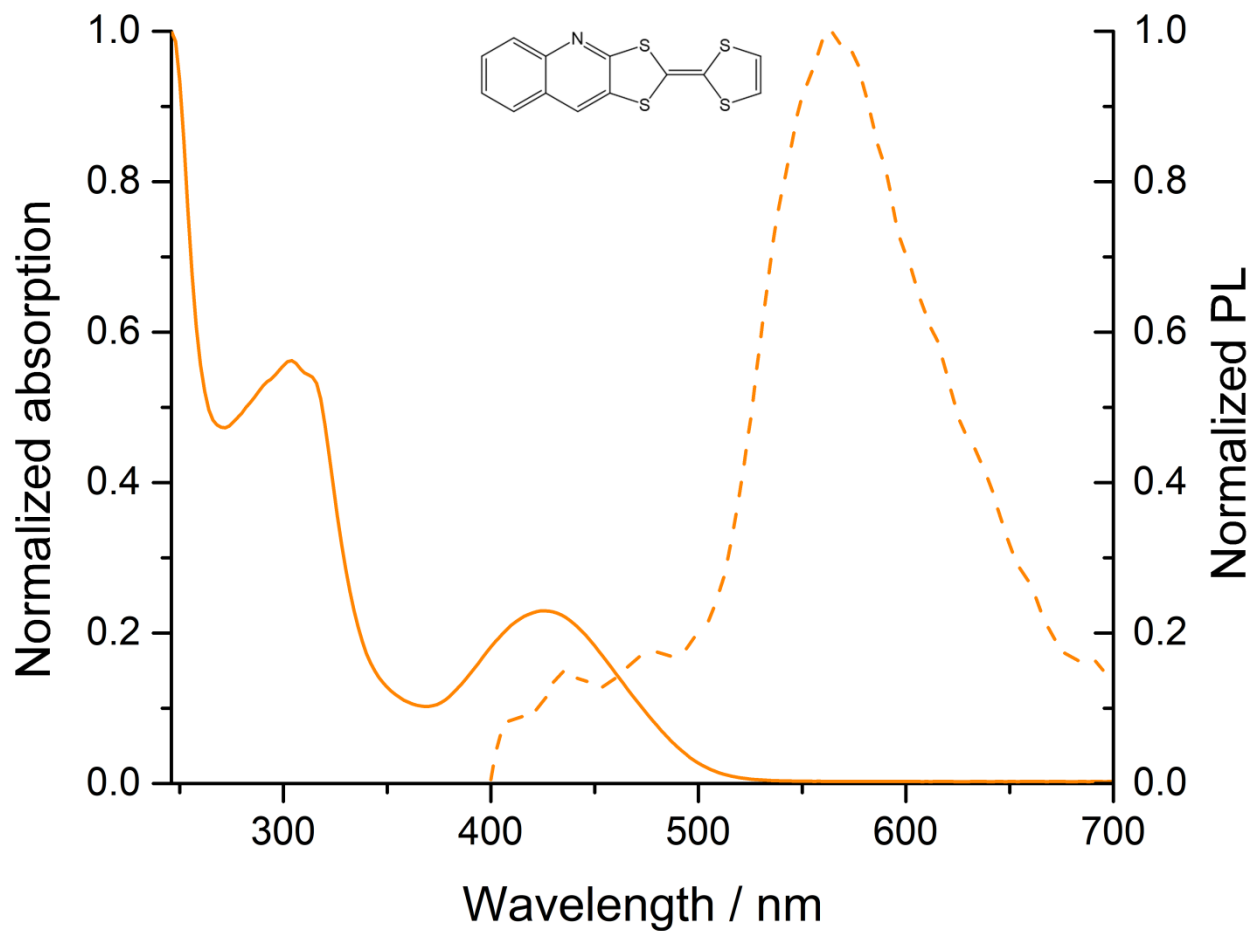

**Figure 11:** Normalized absorption and photoluminescence spectrum of compound **10m** in solution (50  $\mu\text{M}$  in  $\text{CHCl}_3$ ).

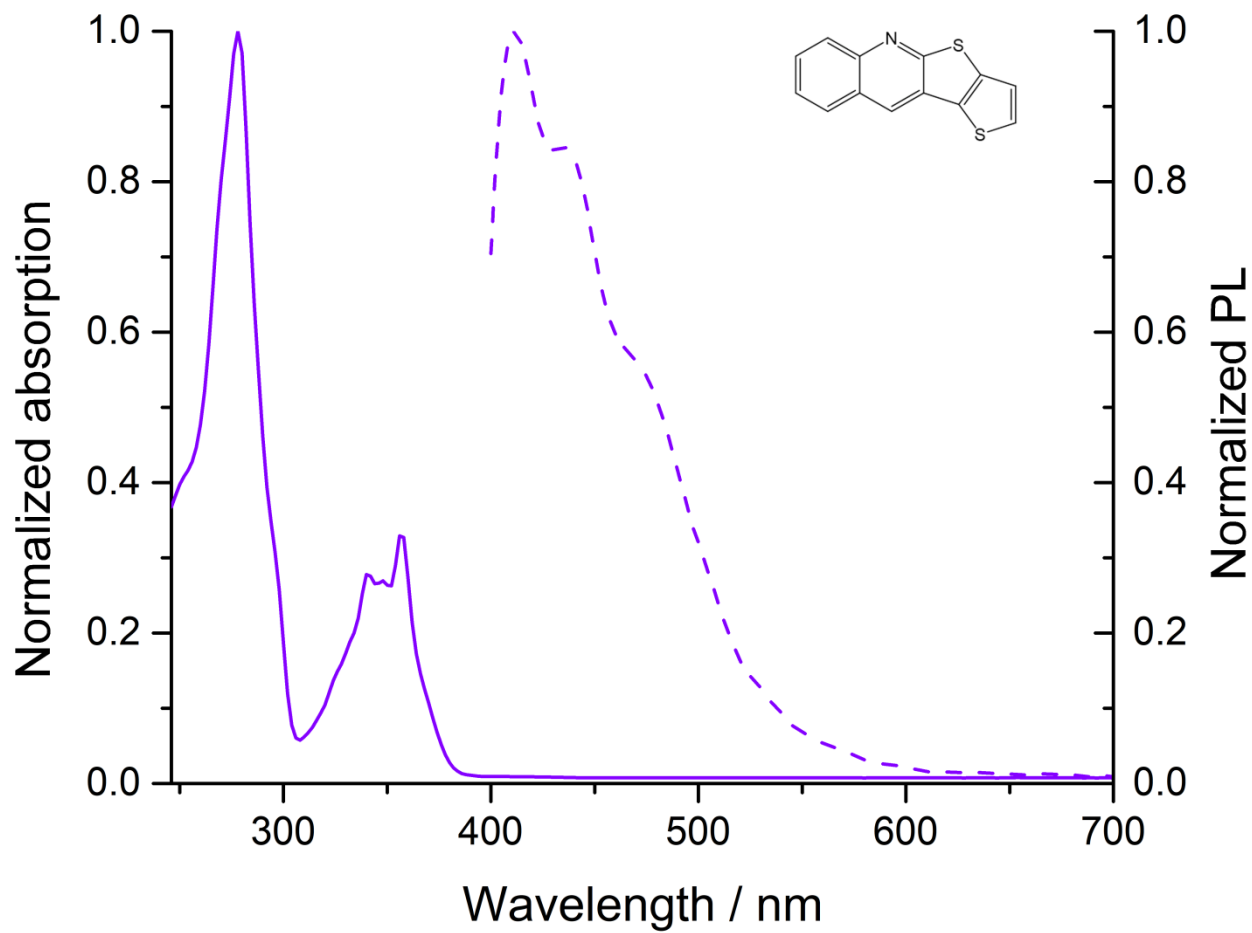

**Figure 12:** Normalized absorption and photoluminescence spectrum of compound **10n** in solution (50  $\mu\text{M}$  in  $\text{CHCl}_3$ ).

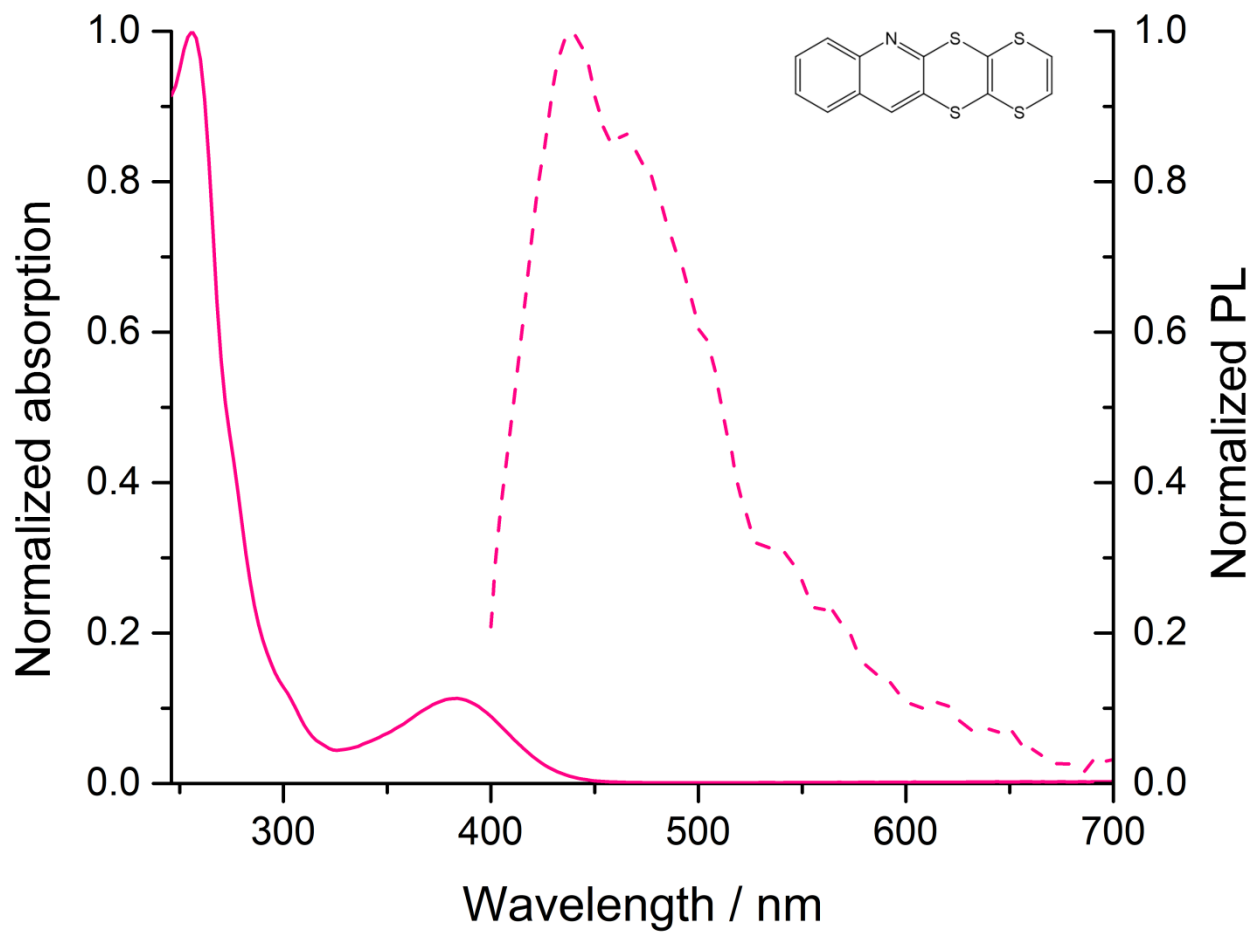

**Figure 13:** Normalized absorption and photoluminescence spectrum of compound **10o** in solution (50  $\mu$ M in  $\text{CHCl}_3$ ).



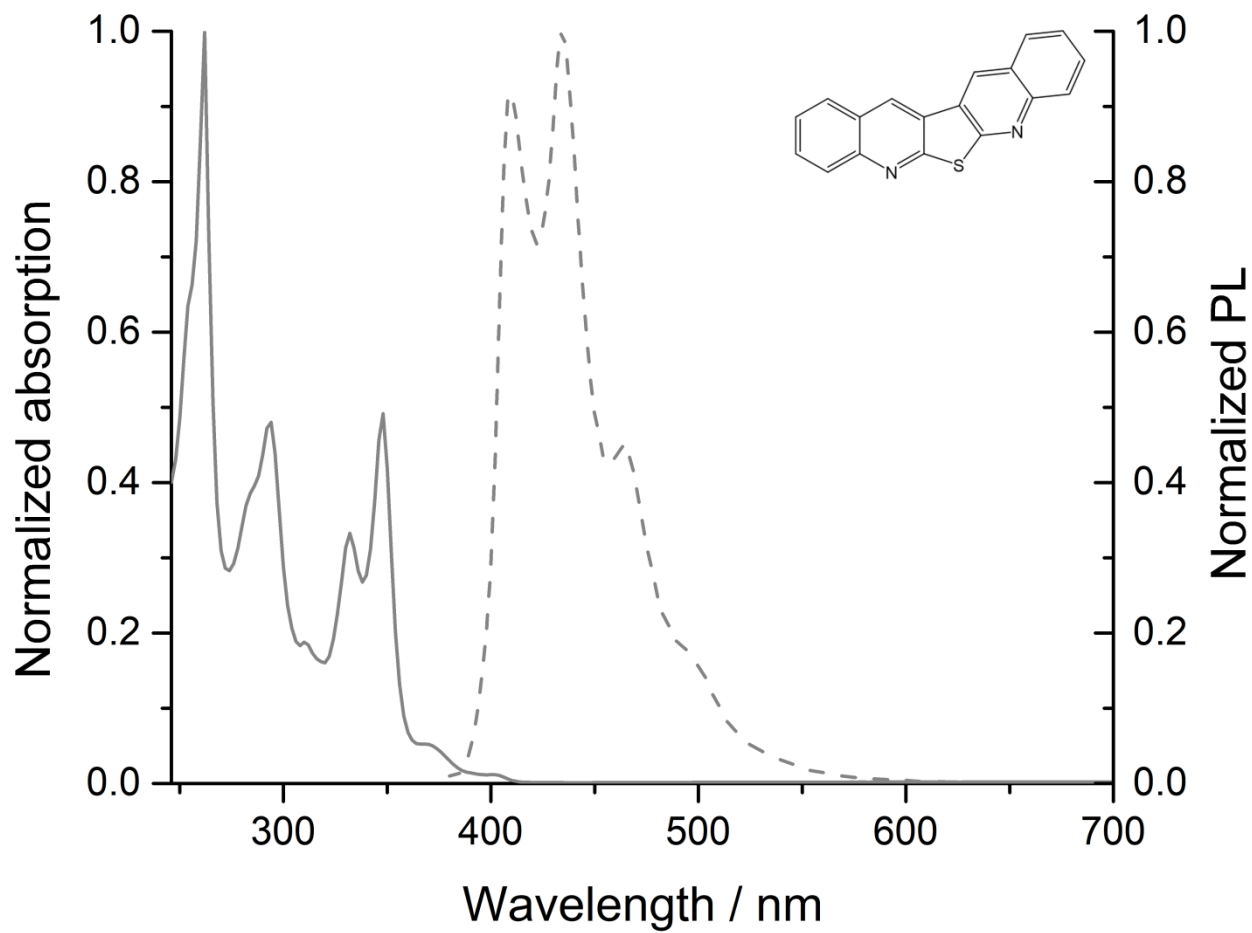

**Figure 14:** Normalized absorption and photoluminescence spectrum of compound **14** in solution (50  $\mu\text{M}$  in  $\text{CHCl}_3$ ).

## Tauc plots

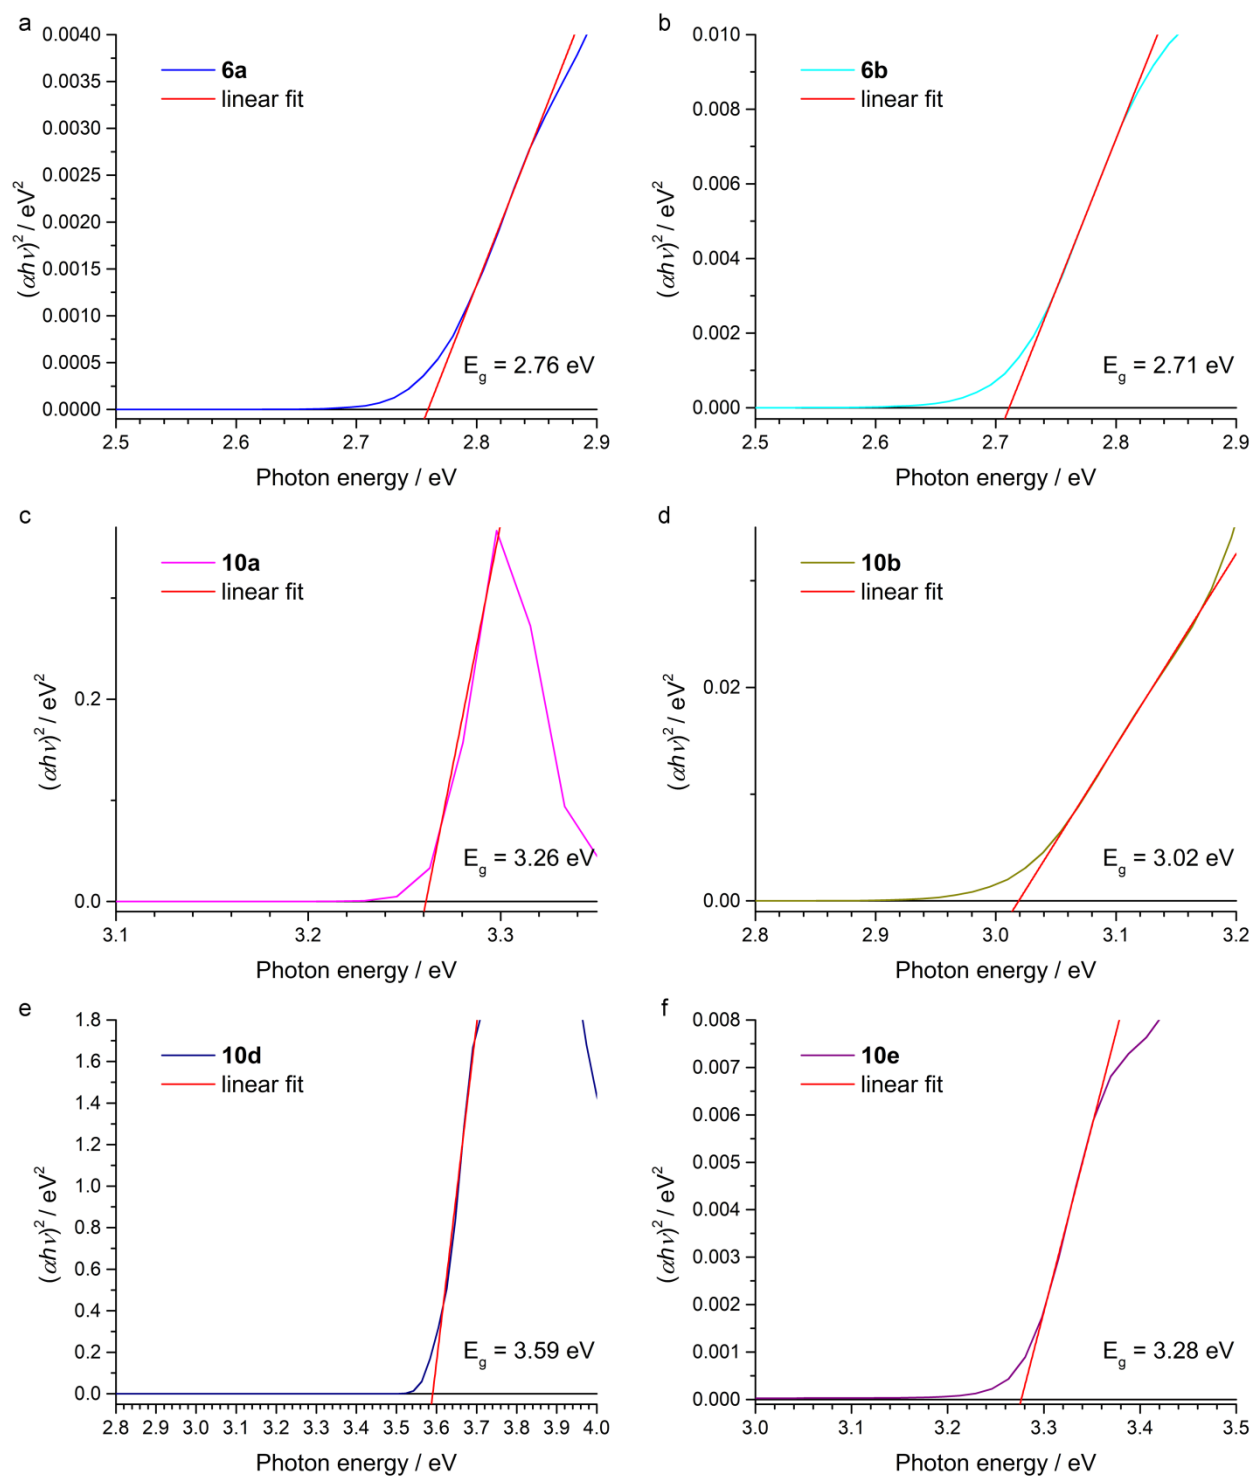

**Figure 15:** Tauc plots generated from optical absorption spectra of selected condensed N-heterocycles and linear fits for direct band gaps (red). The energy of the bandgap is shown in each graph on the bottom right.

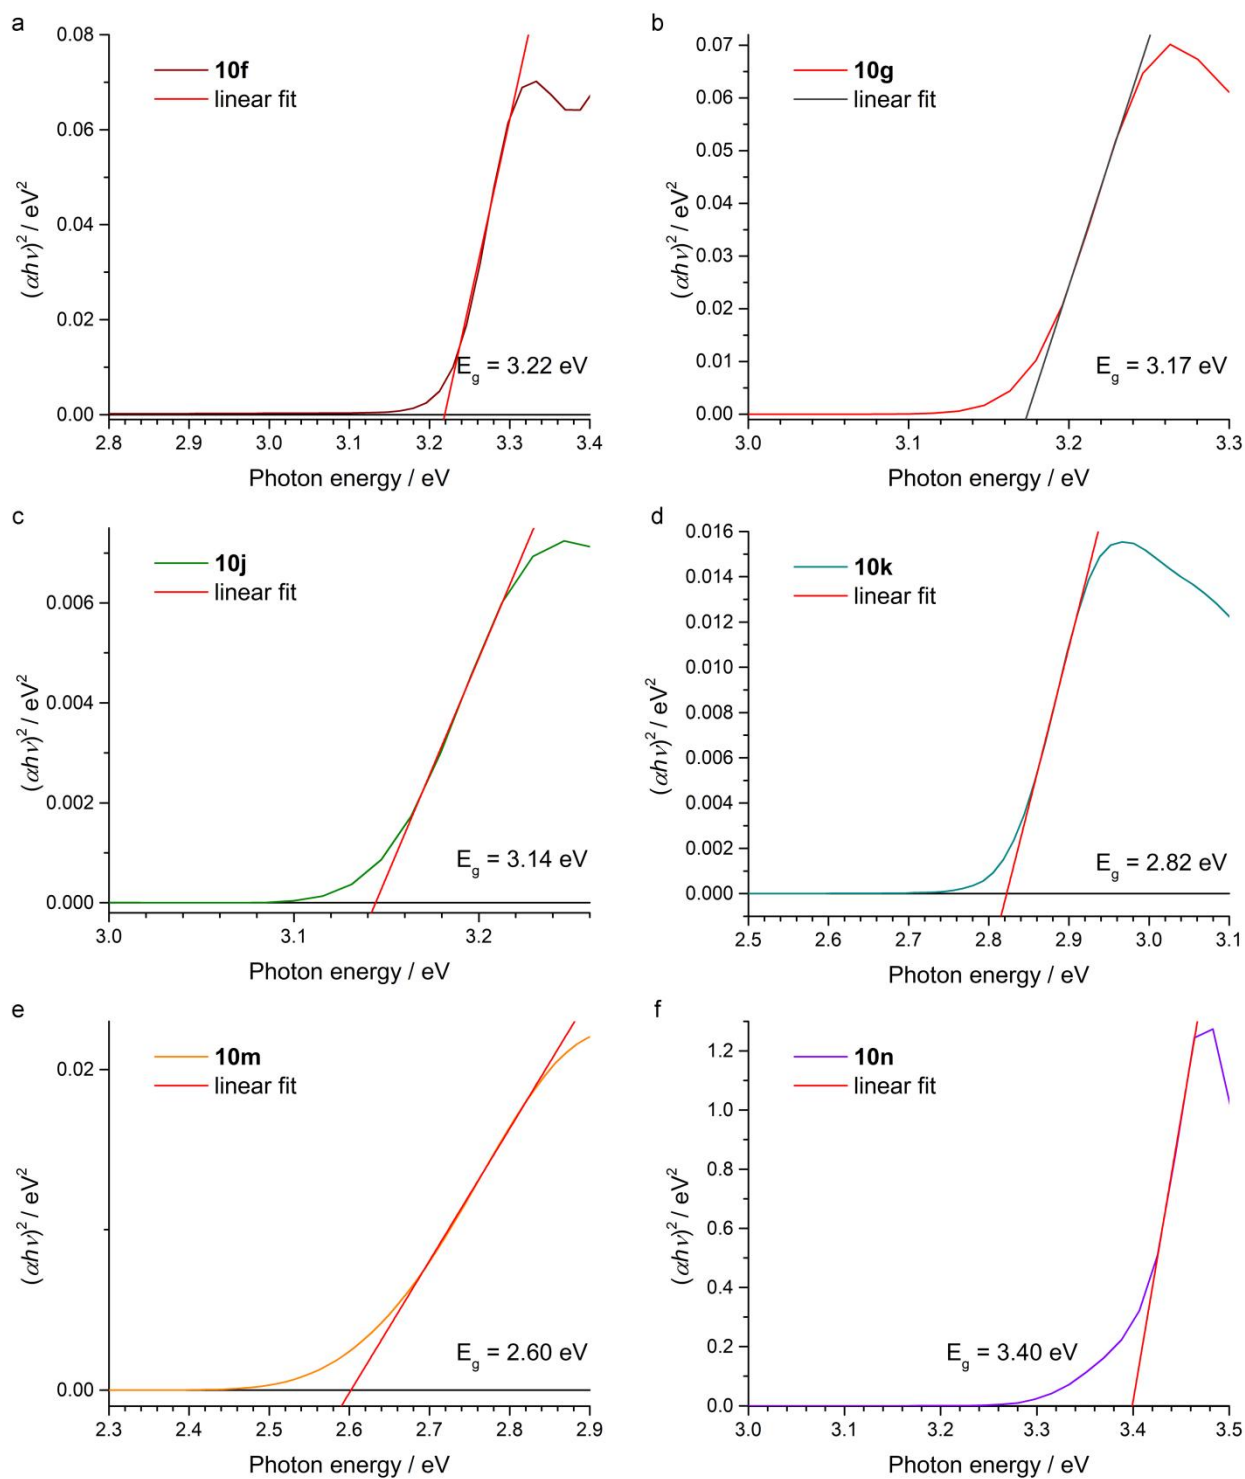

**Figure 16:** Tauc plots generated from optical absorption spectra of selected condensed N-heterocycles and linear fits for direct band gaps (red, except (b) in grey). The energy of the bandgap is shown in each graph on the bottom right.

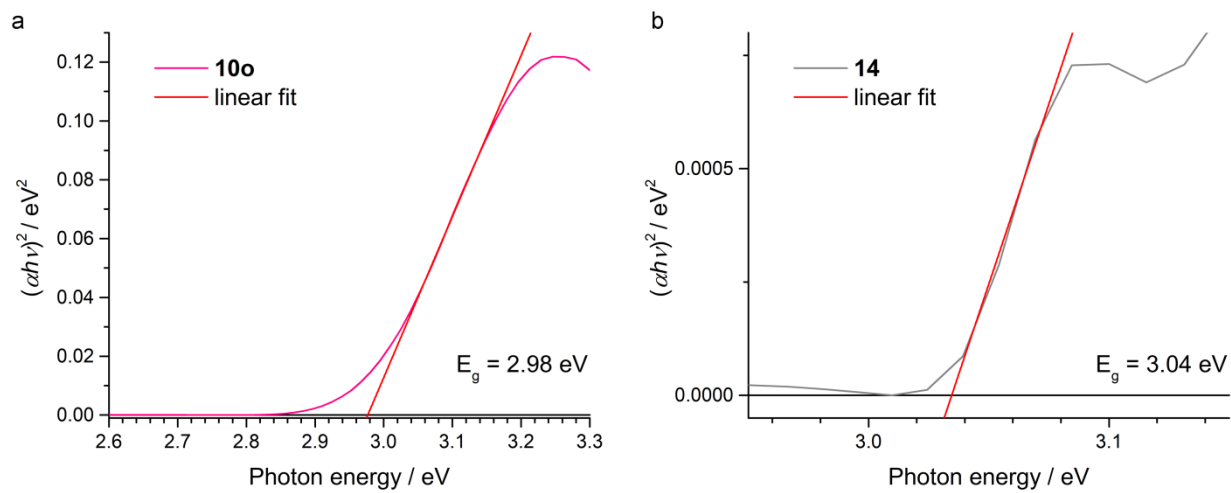

**Figure 17:** Tauc plots generated from optical absorption spectra of selected condensed N-heterocycles and linear fits for direct band gaps (red). The energy of the bandgap is shown in each graph on the bottom right.

## Photoluminescence quantum yield

We measured the photoluminescence quantum yield PLQY using a PicoQuant FluoTime 300 spectrometer and the software *easytau*.

| Compound   | PLQY / % |
|------------|----------|
| <b>6b</b>  | 37.32    |
| <b>10b</b> | 26.35    |
| <b>6a</b>  | 15.31    |
| <b>10a</b> | 4.89     |
| <b>14</b>  | 3.39     |
| <b>10k</b> | 2.13     |
| <b>10n</b> | 1.56     |
| <b>10e</b> | 1.13     |
| <b>10f</b> | 0.87     |
| <b>10g</b> | 0.39     |
| <b>10j</b> | 0.17     |
| <b>10d</b> | 0        |
| <b>10m</b> | 0        |
| <b>10o</b> | 0        |

## Time-correlated single photon counting

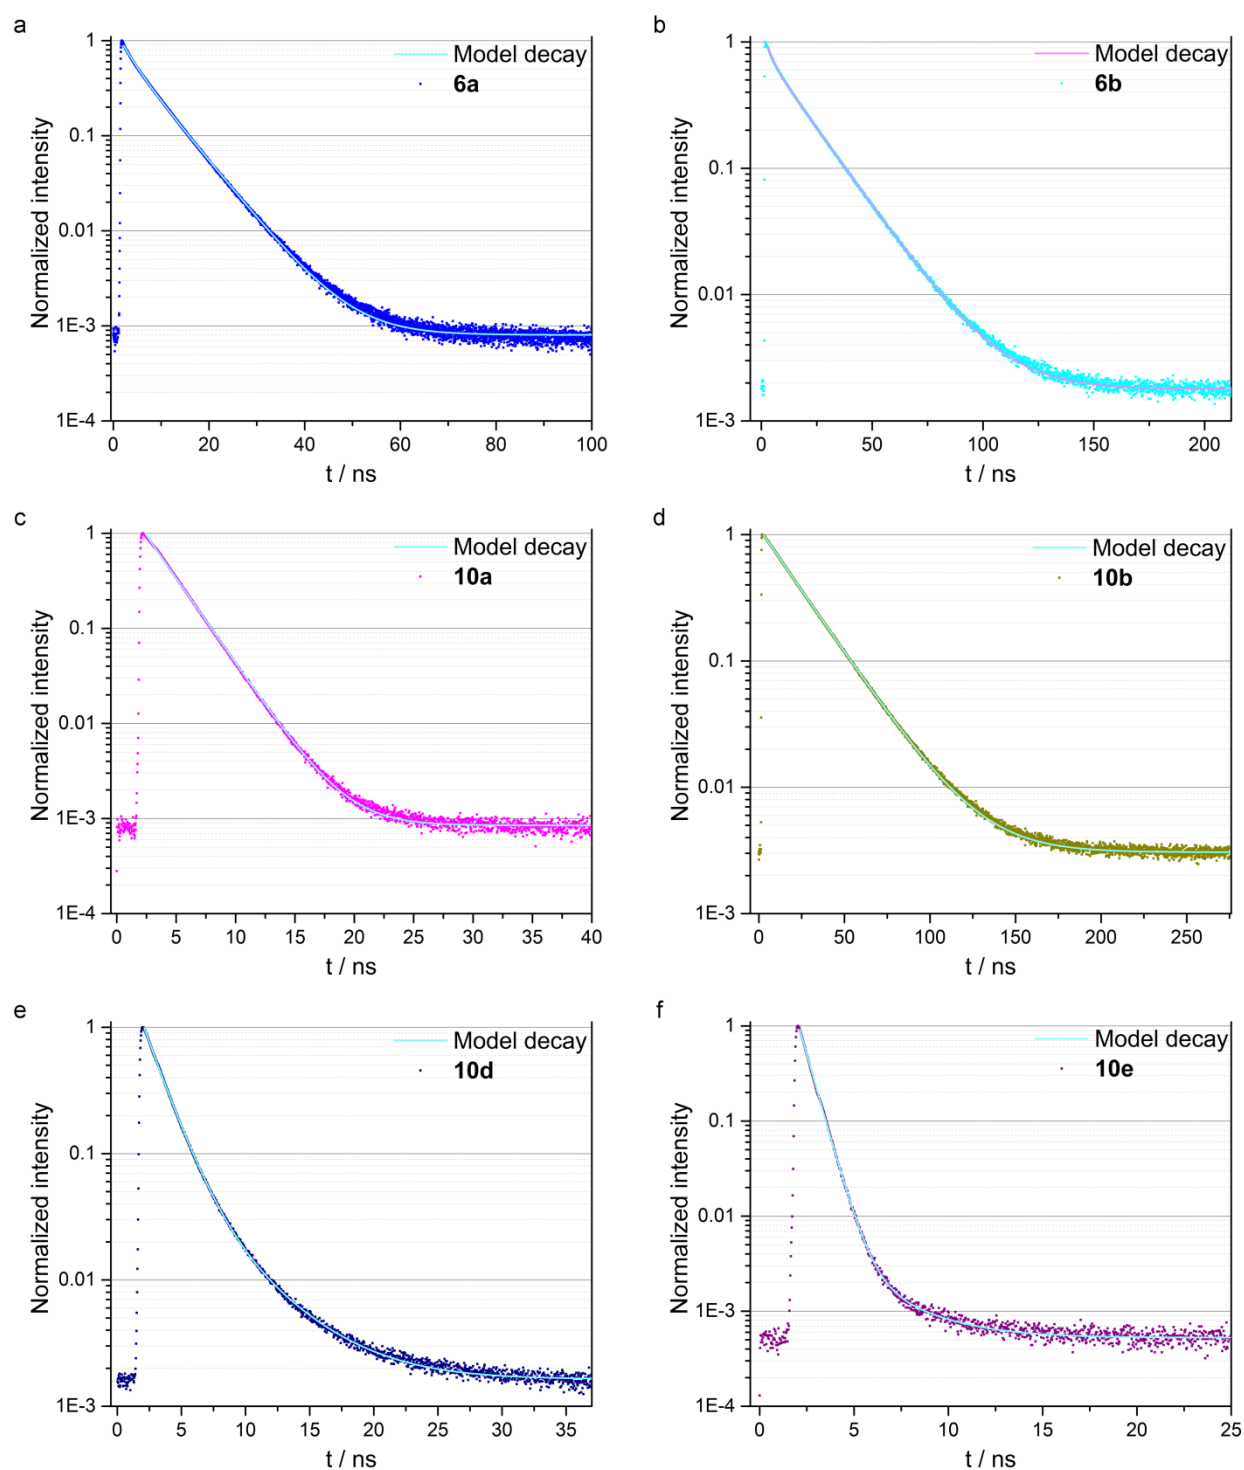

**Figure 18:** PL decay of selected condensed N-heterocycles excited at 378 nm and measured at the corresponding maxima of the PL emissions. All samples were measured in solution (50  $\mu\text{M}$  in  $\text{CHCl}_3$ ). Experimental decay is shown in dots and the corresponding mono- or bi-exponential fit of the decay as light cyan line.

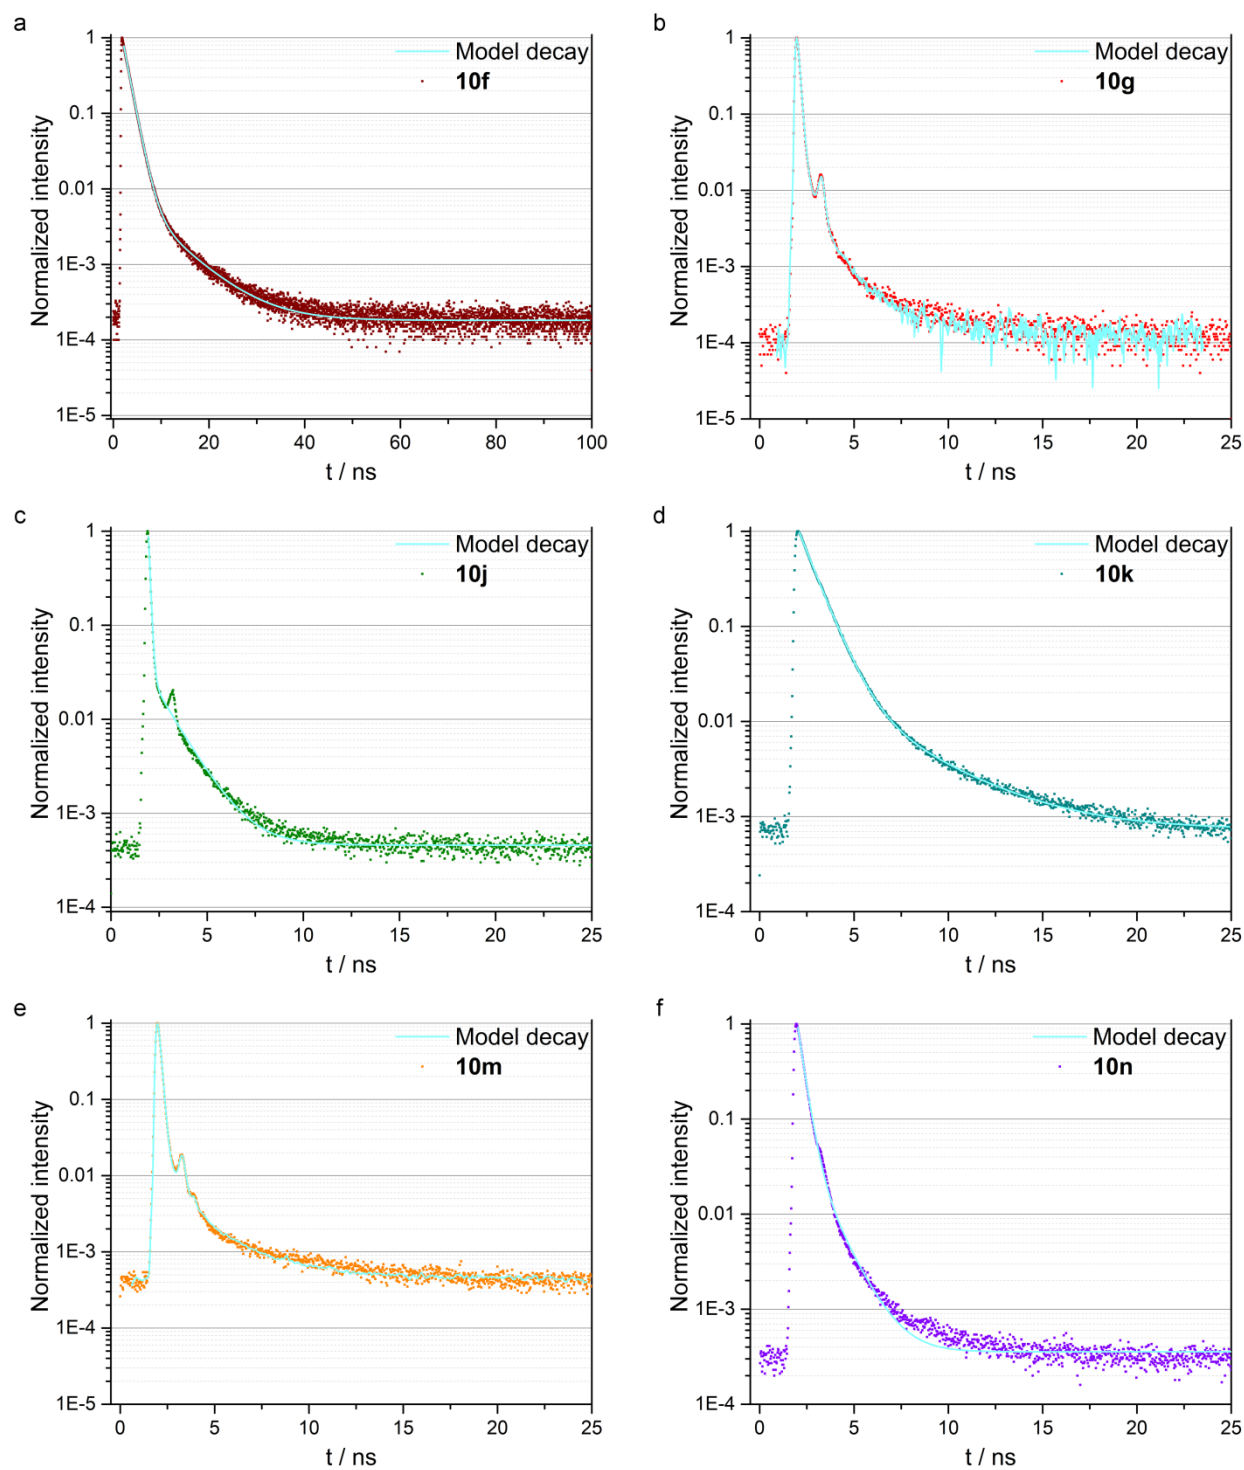

**Figure 19:** PL decay of selected condensed N-heterocycles excited at 378 nm and measured at the corresponding maxima of the PL emissions. All samples were measured in solution (50  $\mu\text{M}$  in  $\text{CHCl}_3$ ). Experimental decay is shown in dots and the corresponding mono- or bi-exponential fit of the decay as light cyan line. The additional peak in the decay is due to the instrument response function that can be observed for fast decays (b, c, e)

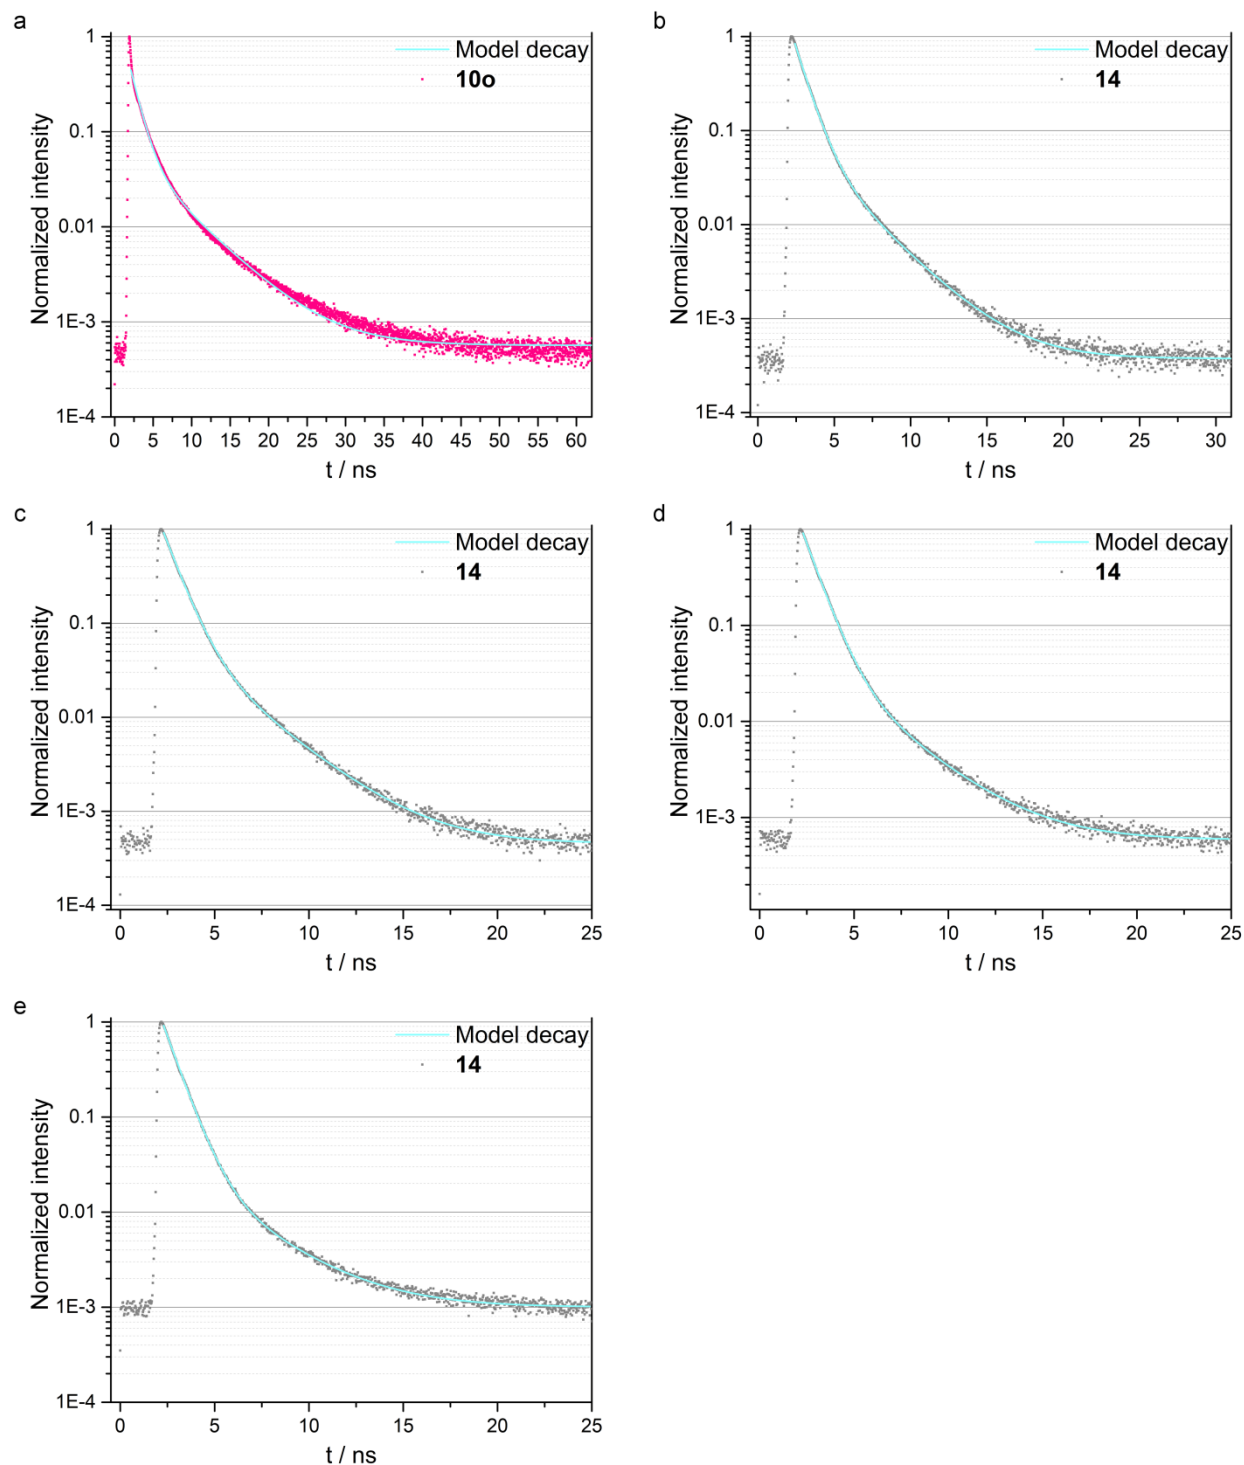

**Figure 20:** PL decay of selected condensed N-heterocycles excited at 378 nm and measured at the corresponding maxima of the PL emissions. All samples were measured in solution (50  $\mu\text{M}$  in  $\text{CHCl}_3$ ). Experimental decay is shown in dots and the corresponding mono- or bi-exponential fit of the decay as light cyan line. For compound 14 the decay traces have been recorded at different emission wavelength of the four maxima in the PL spectrum: (b) 410 nm, (c) 434 nm, (d) 464 nm, (e) 494 nm.



**Table 1:** PL decay times of compounds shown above. The given errors are uncertainties from the fit and hence do not reflect the real time-resolution of the setup. The latter is limited by the laser pulse duration of around 100 ps.

|            |          | $\tau$ / ns | error / ns   | fractional intensity / % |
|------------|----------|-------------|--------------|--------------------------|
| <b>6a</b>  | $\tau_1$ | 7.08        | $\pm 0.02$   | 75.7                     |
|            | $\tau_2$ | 2.61        | $\pm 0.06$   | 24.3                     |
| <b>6b</b>  | $\tau_1$ | 17.51       | $\pm 0.05$   | 80.3                     |
|            | $\tau_2$ | 3.2         | $\pm 0.2$    | 19.7                     |
| <b>10a</b> | $\tau_1$ | 2.414       | $\pm 0.007$  | 100                      |
| <b>10b</b> | $\tau_1$ | 22.00       | $\pm 0.06$   | 100                      |
| <b>10d</b> | $\tau_1$ | 1.478       | $\pm 0.004$  | 92.8                     |
|            | $\tau_2$ | 4.27        | $\pm 0.03$   | 7.2                      |
| <b>10e</b> | $\tau_1$ | 2.7         | $\pm 0.1$    | 0.6                      |
|            | $\tau_2$ | 0.615       | $\pm 0.002$  | 99.4                     |
| <b>10f</b> | $\tau_1$ | 7.2         | $\pm 0.1$    | 1.1                      |
|            | $\tau_2$ | 1.305       | $\pm 0.005$  | 98.9                     |
| <b>10g</b> | $\tau_1$ | 1.10        | $\pm 0.09$   | 0.2                      |
|            | $\tau_2$ | 0.0670      | $\pm 0.0008$ | 99.8                     |
| <b>10j</b> | $\tau_1$ | 1.23        | $\pm 0.03$   | 3.3                      |
|            | $\tau_2$ | 0.085       | $\pm 0.002$  | 96.7                     |
| <b>10k</b> | $\tau_1$ | 3.59        | $\pm 0.04$   | 2.6                      |
|            | $\tau_2$ | 0.849       | $\pm 0.002$  | 97.4                     |
| <b>10m</b> | $\tau_1$ | 2.1         | $\pm 0.1$    | 0.2                      |
|            | $\tau_2$ | 0.1225      | $\pm 0.0007$ | 99.8                     |
| <b>10n</b> | $\tau_1$ | 1.06        | $\pm 0.02$   | 5.9                      |
|            | $\tau_2$ | 0.315       | $\pm 0.003$  | 94.1                     |

|                                       |          |       |             |      |
|---------------------------------------|----------|-------|-------------|------|
| <b>10o</b>                            | $\tau_1$ | 5.5   | $\pm 0.1$   | 12.2 |
|                                       | $\tau_2$ | 1.19  | $\pm 0.02$  | 87.8 |
| <b>14</b> ( $\lambda_{em.} = 410$ nm) | $\tau_1$ | 2.72  | $\pm 0.02$  | 8.6  |
|                                       | $\tau_2$ | 0.789 | $\pm 0.003$ | 91.4 |
| <b>14</b> ( $\lambda_{em.} = 434$ nm) | $\tau_1$ | 2.71  | $\pm 0.02$  | 7.7  |
|                                       | $\tau_2$ | 0.791 | $\pm 0.003$ | 92.3 |
| <b>14</b> ( $\lambda_{em.} = 464$ nm) | $\tau_1$ | 2.74  | $\pm 0.02$  | 5.1  |
|                                       | $\tau_2$ | 0.776 | $\pm 0.002$ | 94.9 |
| <b>14</b> ( $\lambda_{em.} = 494$ nm) | $\tau_1$ | 3.03  | $\pm 0.03$  | 3.5  |
|                                       | $\tau_2$ | 0.767 | $\pm 0.002$ | 96.5 |

## Cyclic voltammetry and energy levels of HOMO and LUMO

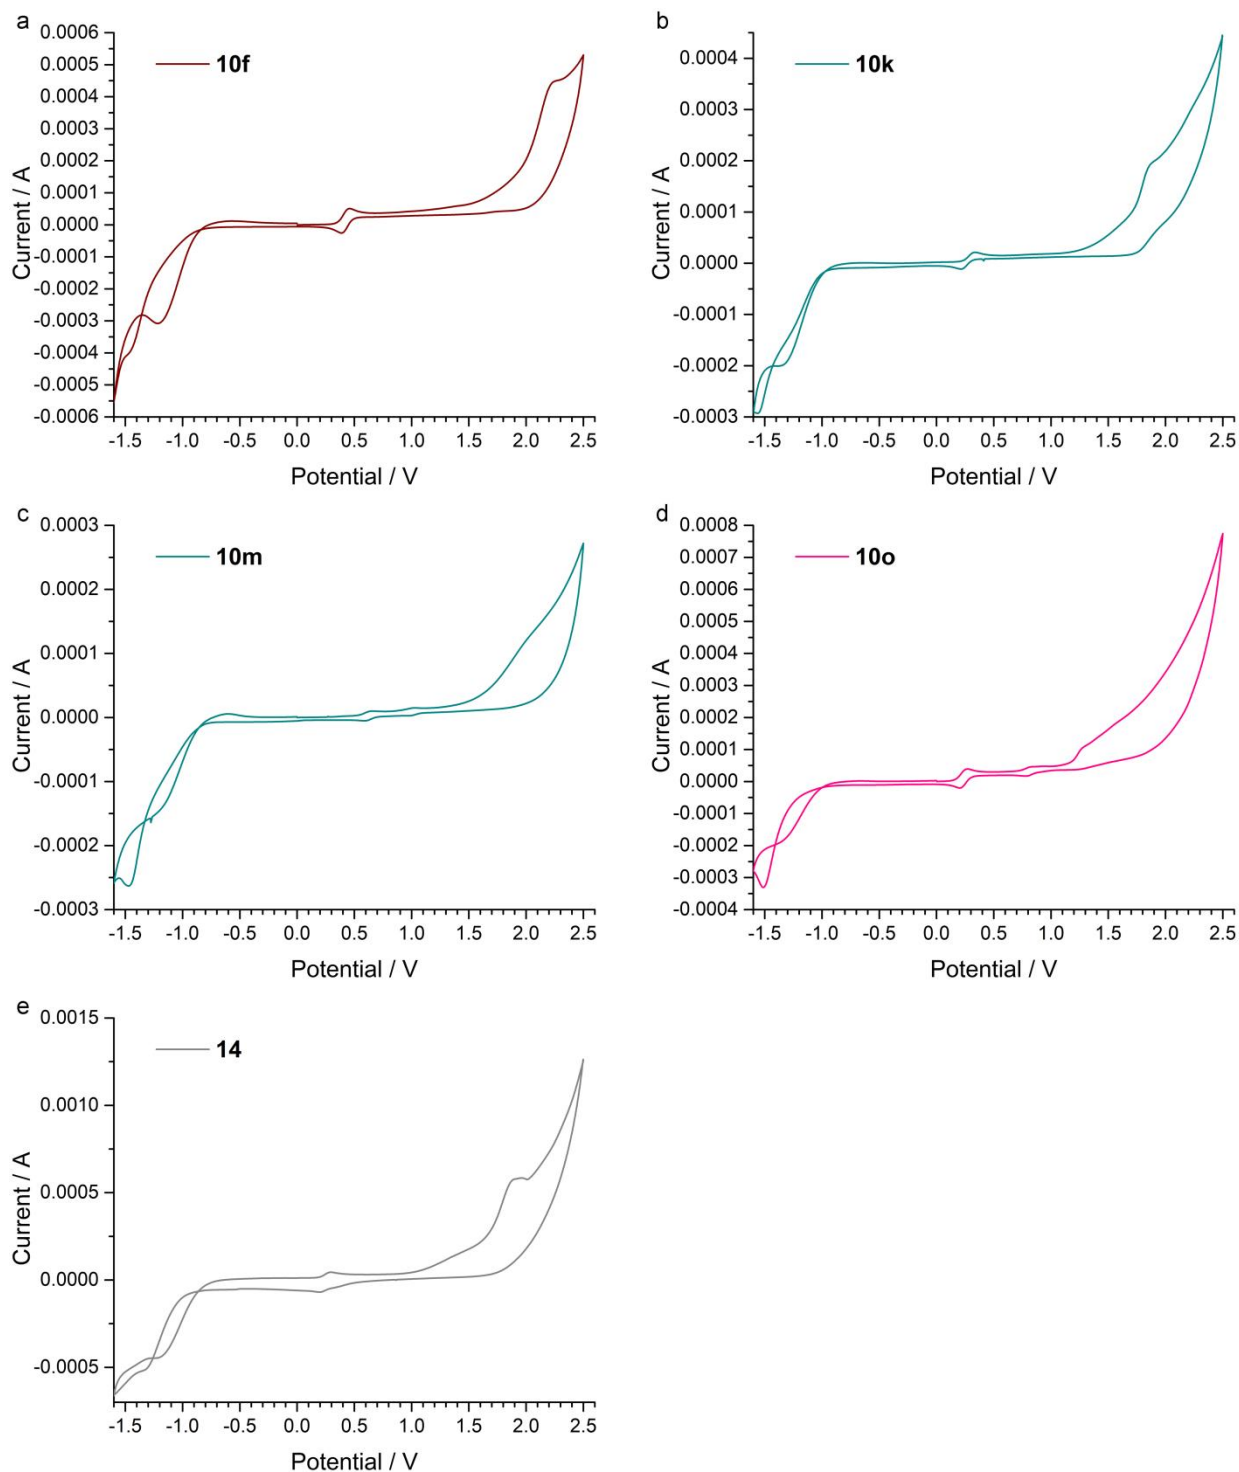

**Figure 21:** CV measurements of compounds **10f**, **10k**, **10m**, **10o**, and **14**. All samples were measured according to the procedure described before. Below the potential of  $-1.0$  V the redox behavior of the electrolyte can be observed. An external reference was used for **10m** due to the overlap of the signals.

**Table 2:** CV measurements of the compounds and the corresponding optical determined HOMO-LUMO gaps lead to the exact positions of the HOMO and LUMO of the selected condensed N-heterocycles.

| HOMO / eV | LUMO / eV |
|-----------|-----------|
|-----------|-----------|

---

|            |      |      |
|------------|------|------|
| <b>10f</b> | -6.3 | -3.1 |
| <b>10k</b> | -6.3 | -3.4 |
| <b>10m</b> | -4.9 | -2.3 |
| <b>10o</b> | -5.3 | -2.3 |
| <b>14</b>  | -6.2 | -3.2 |
